# Supplementary material for: A highly flexible and washable nonwoven photothermal cloth for efficient and practical solar steam generation
Source: Royal Society of Chemistry journal article supplement (doi:10.1039/c8ta00187a), 2018-01-01
Supplement: c8ta00187a2.pdf [file c8ta00187a2.pdf]

## Supporting Information

### Highly Flexible and Washable Nonwoven Photothermal Cloth for Efficient and Practical Water Evaporation Applications

Yong Jin<sup>1#</sup>, Jian Chang<sup>1#</sup>, Yusuf Shi<sup>1</sup>, Le Shi<sup>1</sup>, Seunghyun Hong<sup>1</sup>, Peng Wang<sup>\*1,2</sup>

1. Water Desalination and Reuse Center, Division of Biological and Environmental Science and Engineering, King Abdullah University of Science and Technology, Thuwal, Saudi Arabia, 23955-6900

2. KAUST Solar Center, King Abdullah University of Science and Technology, Thuwal, Saudi Arabia, 23955-6900

# Both authors contributed equally; \*Corresponding author: [peng.wang@kaust.edu.sa](mailto:peng.wang@kaust.edu.sa)

#### Contents

*Movie S1. Handwashing demonstration of our prepared photothermal cloth.*

*S1. Tensile strength test of the polymer/carbon composite.*

*S2. Light reflection of the PAN/carbon cloth prepared with different ratios of carbon black to PAN.*

*S3. Light reflection of the PS/carbon cloth prepared with different ratios of carbon black to PS.*

*S4. Light absorption of pure carbon black versus the wet nylon-c cloth*

*S5. Wettability of nylon-c cloth*

*S6. Calculation of Rayleigh number and heat transfer coefficient in our system.*

*S7. Synthetic seawater evaporation by the salt-fouled nylon-c cloth and the same cloth after being hand-washed to have cleaned the salt off.*

S1. Morphology of electrospun materials with different polymers and there tensile strength test.

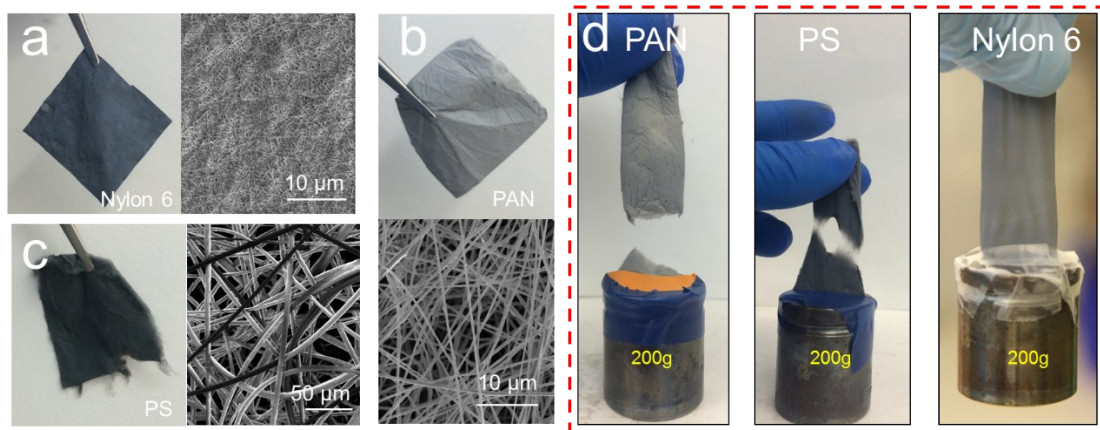

Figure S1. Optical and SEM images of the electrospun (a) nylon 6/carbon cloth; (b) PAN/carbon cloth; (c) PS/carbon cloth; (d) images show that the nylon-c cloth can easily hold 200g weight while the PAN and PS ones cannot. The width of the tested clothes is 2 cm in all cases.

S2. Light reflection of the PAN/carbon cloth prepared with different ratios of carbon black to PAN.

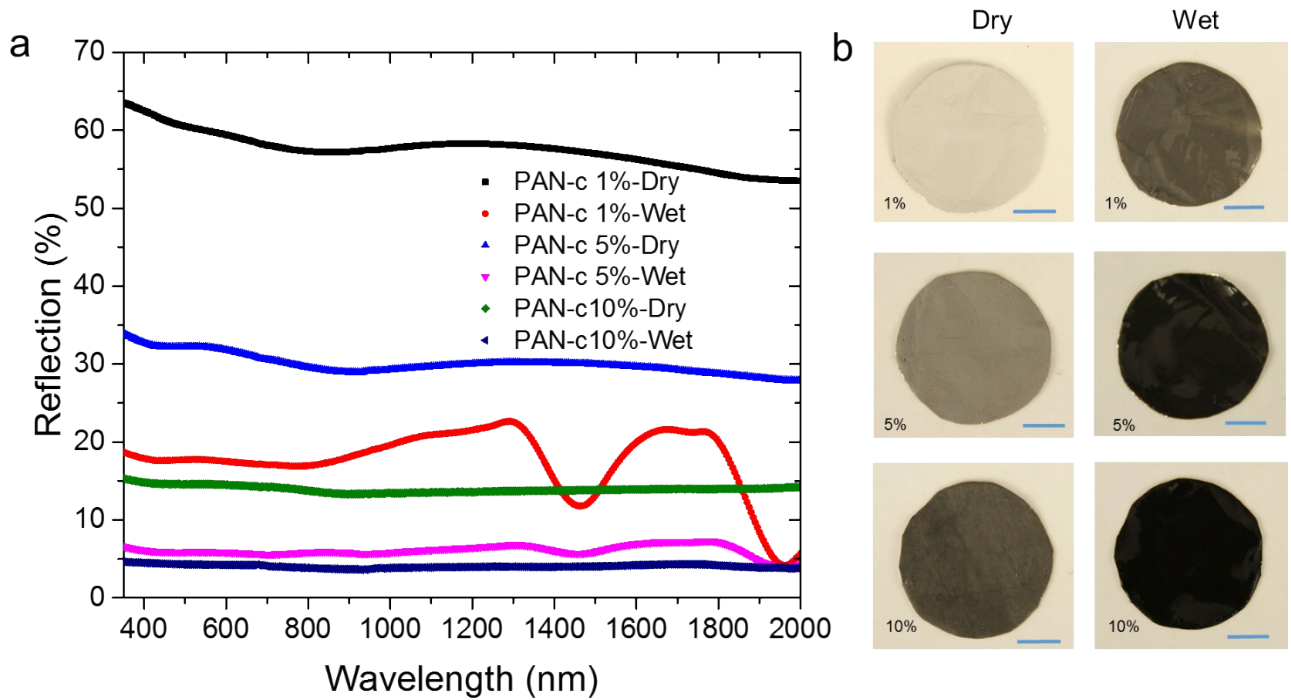

Figure S2. (a) UV-Vis-IR reflection of the nonwoven clothes composed of different carbon black to PAN ratios in dry and wet conditions; (b) optical images indicating the color of nonwoven cloth composed of different carbon black to PAN ratios in dry and wet conditions, scale bar:1cm.

S3. Light reflection of the PS/carbon cloth prepared with different ratios of carbon black to PS.

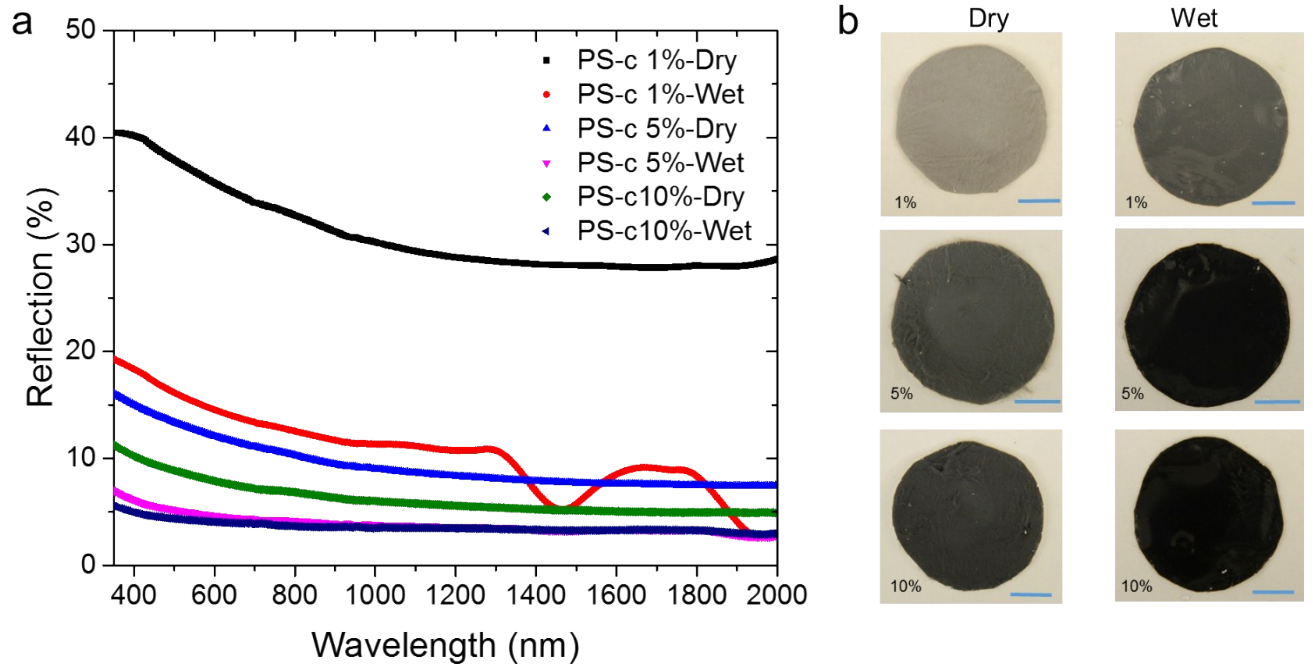

Figure S3. (a) UV-Vis-IR reflection of nonwoven cloth composed of different carbon black to PS ratios in dry and wet conditions; (b) optical images indicating the color of nonwoven cloth composed of different carbon black to PS ratios in dry and wet conditions, scale bar:1cm.

S4. Light absorption of pure carbon black versus the wet nylon-c cloth

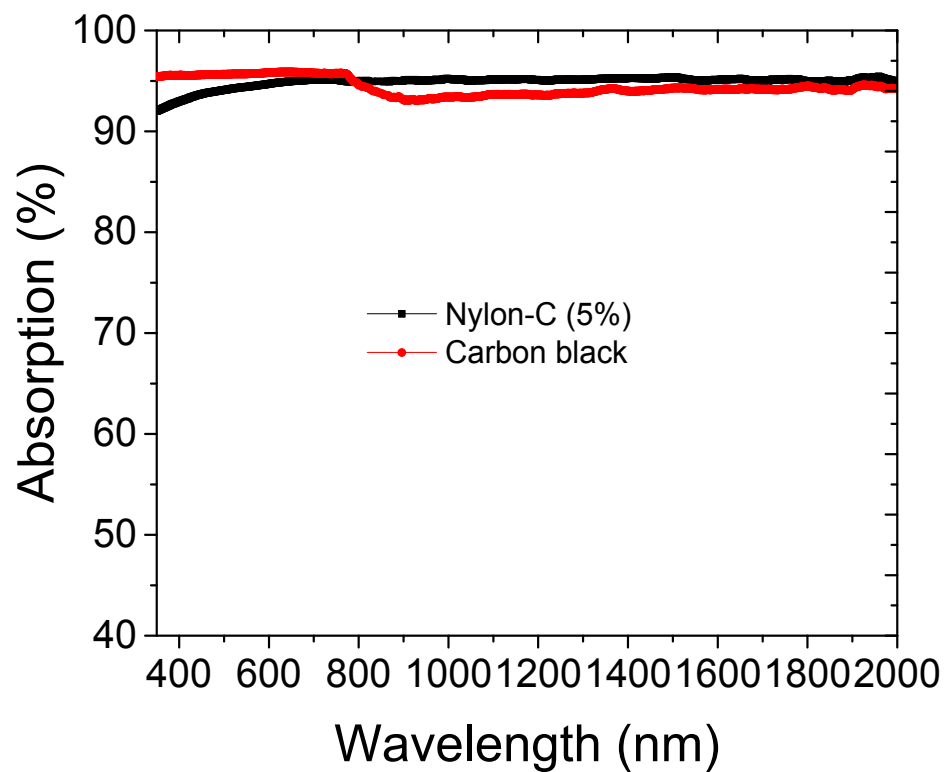

Figure S4 Light absorption of pure carbon black *versus* the wet nylon-c cloth

S5. Wettability of nylon-c cloth

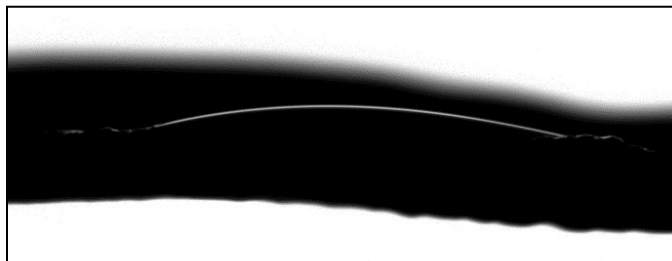

Figure s5. Super hydrophilic property of nylon-c cloth. Due to the hydrophilic property of nylon 6 and porosity of the cloth, water can easily spread on the cloth.

S6. Calculation of Rayleigh number and heat transfer coefficient in our system.

Calculation of convective heat transfer coefficient ( $h_c$ ):

In a horizontal natural convection problem, a dimensionless number, Rayleigh number (Ra), is critical in determination of  $h_c$ . Rayleigh number can be expressed as:

$$Ra = GrPr = \frac{g\beta(T_s - T_\infty)\delta^3}{\nu^2} Pr \quad (\text{Equation S1})$$

Where  $Gr (= \frac{g\beta(T_s - T_\infty)\delta^3}{\nu^2})$  is the Grashof number which is a dimensionless number in fluid dynamics and heat transfer approximating the ratio of the buoyancy to viscous force acting on a fluid. Pr is a dimensionless number defined as the ratio of momentum diffusivity to thermal diffusivity.  $g$  is the gravitational constant.  $\beta$  is coefficient of volume expansion,  $1/T$ .  $\delta$  is characteristic length of the geometry.  $\nu$  is kinematics viscosity of the fluid.

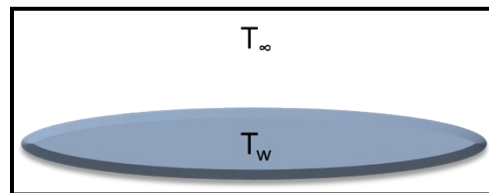

Figure S6

As shown in the above figure, the substrate temperature  $T_w$  is  $38^\circ\text{C}$  and the ambient environment temperature  $T_\infty$  is  $21^\circ\text{C}$ . The diameter of substrate,  $D$ , is equal to  $3.74\text{ cm}$ .

$$\text{Film temperature } T_f = (T_w + T_\infty)/2 = 29.5^\circ\text{C} = 302.5\text{K}$$

$$\beta = 1/T_f = 3.3 \times 10^{-3} \text{ K}^{-1}$$

$$\nu = 1.6 \times 10^{-5} \text{ m}^2/\text{s at } 30^\circ\text{C}$$

$$g = 9.8 \text{ m/s}^2$$

$$\delta = \text{Area} / \text{Perimeter} = r/2 = 0.094 \times 10^{-2}$$

$$\text{Pr} = 0.71 \text{ at } 29.5 \text{ }^\circ\text{C} \text{ for air}$$

$$\text{Ra} = 1783$$

$$\text{Nusselt number: } \text{Nu} = 0.59 \times \text{Ra}^{0.25} = 3.9$$

$$h_c = \frac{N_u \times k}{\delta} = 1.1$$

Note that humidity has little effect on the Pr and kinematic viscosity. Thermal conductivity of air at low temperature does not significantly vary with humidity.

After applying all the parameters, Ra in our system is 1783 for an equilibrium temperature of 38 °C, which is quite small. At even lower equilibrium temperature (27 °C), the main heat transfer to the ambient air is by conduction which can be neglected due to the low thermal conductivity of air. This result indicates that major heat transfer from the nylon-c cloth is by the radiation loss (~105 W/m<sup>2</sup>) and heat convection loss is small (19 W/m<sup>2</sup>). Thus, the overall solar energy utilization efficiency is around 82% for the nylon-c cloth with a 5% carbon ratio. The efficiency of the cloth with 1% carbon black ratio is smaller than 5% due to its poor light absorption in the visible range.



S7. Synthetic seawater evaporation by the salt-fouled nylon-c cloth and the same cloth after being hand-washed to have cleaned the salt off.

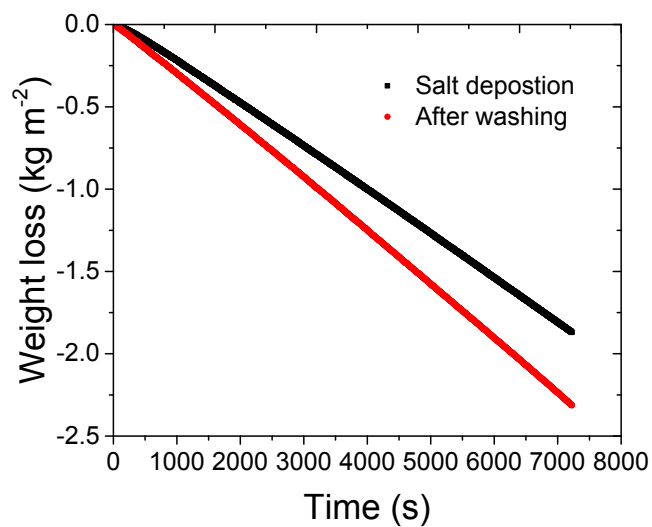

Figure S7. Synthetic seawater evaporation by the salt-fouled nylon-c cloth and the same cloth after being hand-washed to have cleaned the salt off.
